# Supplementary material for: Cross-sectional Associations between Exposure to Persistent Organic Pollutants and Leukocyte Telomere Length among U.S. Adults in NHANES, 2001–2002
Source: PubMed Central journal article supplement (PMC4858394; doi:10.1289/ehp.1510187), 2015-10-09
Supplement: ehp.1510187.s001.acco.pdf [file ehp.1510187.s001.acco.pdf]

**Note to readers with disabilities:** *EHP* strives to ensure that all journal content is accessible to all readers. However, some figures and Supplemental Material published in *EHP* articles may not conform to [508 standards](#) due to the complexity of the information being presented. If you need assistance accessing journal content, please contact [ehp508@niehs.nih.gov](mailto:ehp508@niehs.nih.gov). Our staff will work with you to assess and meet your accessibility needs within 3 working days.

## **Supplemental Material**

# **Cross-Sectional Associations between Exposure to Persistent Organic Pollutants and Leukocyte Telomere Length among U.S. Adults in NHANES, 2001-2002**

Susanna D. Mitro, Linda S. Birnbaum, Belinda L. Needham, and Ami R. Zota

### **Table of Contents**

**Figure S1.** Exclusion criteria used to form the study population

**Table S1.** Percent difference (95% CI) in leukocyte telomere length (T/S ratio) by TEQ. Each model treats values below the LOD differently

**Table S2.** Percent difference (95% CI) in leukocyte telomere length (T/S ratio) by non-dioxin-like PCBs, non-ortho PCBs, and TEQ (modeled as wet weights (ng/g or pg/g))

**Table S3.** LTL and risk/odds of dioxin- or PCB-associated cancers

**References**

**Figure S1.** Exclusion criteria used to form the study population.

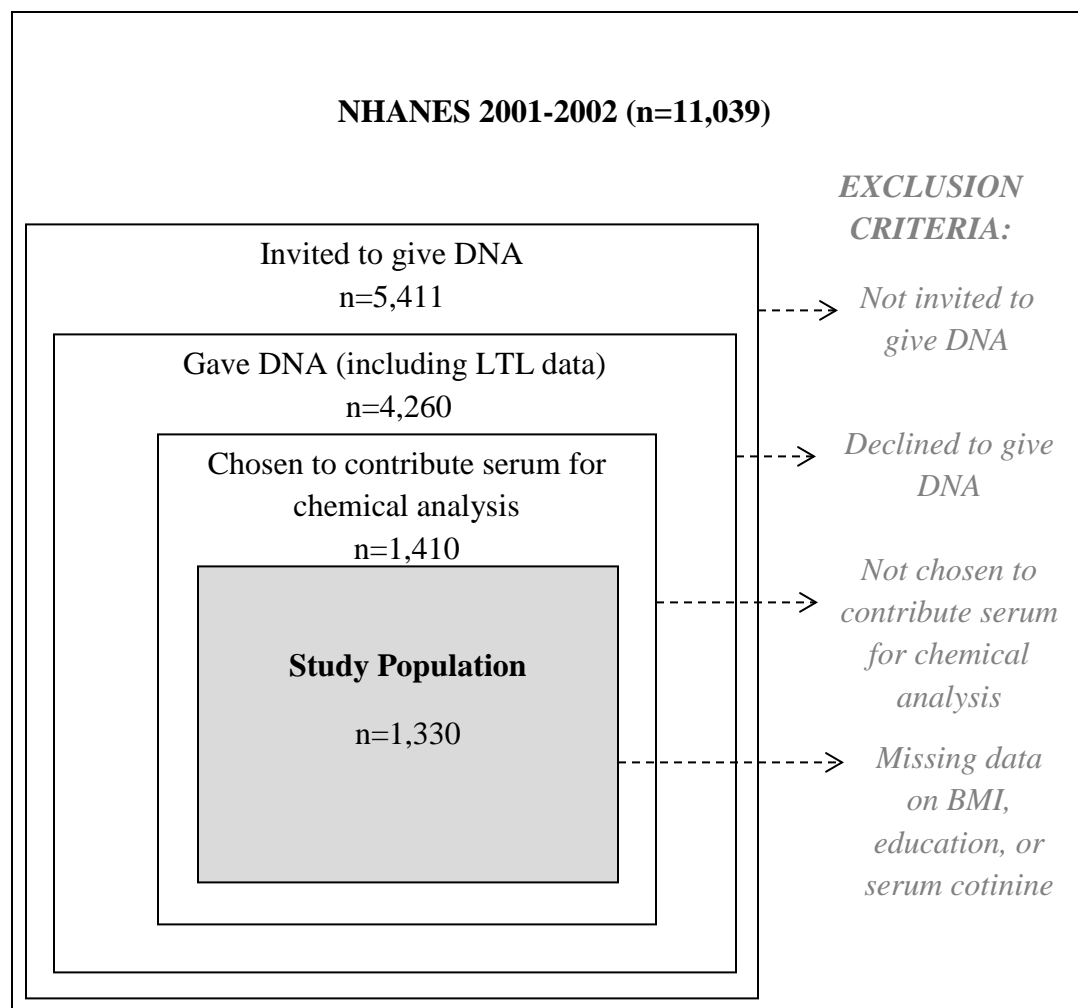

**Table S1.** Percent difference (95% CI) in leukocyte telomere length (T/S ratio) by TEQ. Each model treats values below the LOD differently.

| TEQ metric                        | Model 3 <sup>a</sup> |                       | Treatment of values below the LOD                             |
|-----------------------------------|----------------------|-----------------------|---------------------------------------------------------------|
|                                   | n                    | % difference (95% CI) |                                                               |
| <b>Final model</b>                |                      |                       |                                                               |
| Per doubling of exposure          | 976                  | 5.29 (1.66, 9.05)**   | All congeners included; values <LOD modeled as LOD/√2         |
| <b>Excluding &lt;33% detected</b> |                      |                       |                                                               |
| Per doubling of exposure          | 995                  | 4.84 (1.58, 8.20)**   | Congenens with <33% of values detected are excluded           |
| <b>Excluding &lt;50% detected</b> |                      |                       |                                                               |
| Per doubling of exposure          | 996                  | 4.93 (1.53, 8.44)**   | Congenens with <50% of values detected are excluded           |
| <b>Multiple imputation</b>        |                      |                       |                                                               |
| Per doubling of exposure          | 976                  | 4.30 (1.09, 7.61)*    | All congeners included; values <LOD were imputed <sup>b</sup> |

*Abbreviations:* TEQ: toxic equivalent; CI: confidence interval; LOD: Limit of detection

<sup>a</sup>Model 3 is adjusted for age, age<sup>2</sup>, sex, race/ethnicity, BMI, (log)cotinine, white blood cells, percent lymphocytes, percent monocytes, percent neutrophils, percent eosinophils, percent basophils, serum lipids, and non-dioxin-like PCBs.

<sup>b</sup>We averaged 5 runs of the SAS lifereg model, assuming that the values fell between zero and LOD/√2 for each congener and that the congeners were log-normally distributed, to generate the imputed values. Only congeners with at least 10% of values detected were imputed to ensure valid imputation; for congeners with less than 10% of values detected, the sample-specific LOD/√2 was used for <LOD values.

\**P* < 0.05; \*\* *P* < 0.01

**Table S2.** Percent difference (95% CI) in leukocyte telomere length (T/S ratio) by non-dioxin-like PCBs, non-ortho PCBs, and TEQ (modeled as wet weights (ng/g or pg/g)).

| Metric                         | Model 1 <sup>a</sup> |                       | Model 2 <sup>b</sup> |                       | Model 3 <sup>c</sup> |                       |
|--------------------------------|----------------------|-----------------------|----------------------|-----------------------|----------------------|-----------------------|
|                                | n                    | % difference (95% CI) | n                    | % difference (95% CI) | n                    | % difference (95% CI) |
| <b>Non-dioxin-like PCBs</b>    |                      |                       |                      |                       |                      |                       |
| Per doubling of exposure       | 1265                 | 3.89 (1.24, 6.61)**   | 1259                 | 3.62 (0.93, 6.38)*    | 1093                 | 0.32 (-2.34, 3.06)    |
| Quartile 1 ( $\leq 0.45$ ng/g) |                      | Ref                   |                      | Ref                   |                      | Ref                   |
| Quartile 2 (0.46 – 0.87 ng/g)  |                      | 6.37 (0.34, 12.76)*   |                      | 7.04 (2.05, 12.26)**  |                      | 4.36 (-0.12, 9.03)    |
| Quartile 3 (0.88 – 1.62 ng/g)  |                      | 10.87 (3.84, 18.38)** |                      | 10.88 (4.30, 17.87)** |                      | 5.49 (-0.97, 12.37)   |
| Quartile 4 ( $> 1.62$ ng/g)    |                      | 12.35 (2.91, 22.66)*  |                      | 11.84 (2.61, 21.90)*  |                      | 3.02 (-5.49, 12.31)   |
| <i>P trend</i>                 |                      | 0.013*                |                      | 0.022*                |                      | 0.61                  |
| <b>Non-ortho PCBs</b>          |                      |                       |                      |                       |                      |                       |
| Per doubling of exposure       | 1134                 | 4.21 (2.44, 6.01)**   | 1128                 | 4.22 (2.75, 5.72)**   | 1093                 | 3.68 (2.08, 5.31)**   |
| Quartile 1 ( $\leq 0.17$ pg/g) |                      | Ref                   |                      | Ref                   |                      | Ref                   |
| Quartile 2 (0.18 – 0.29 pg/g)  |                      | 3.51 (-1.93, 9.26)    |                      | 4.27 (-0.82, 9.61)    |                      | 4.30 (-0.89, 9.75)    |
| Quartile 3 (0.30 – 0.48 pg/g)  |                      | 6.10 (-0.18, 12.77)   |                      | 6.55 (0.87, 12.55)*   |                      | 5.31 (0.58, 10.26)*   |
| Quartile 4 ( $> 0.48$ pg/g)    |                      | 11.54 (4.31, 19.27)** |                      | 11.66 (5.04, 18.71)** |                      | 8.78 (2.08, 15.93)*   |
| <i>P trend</i>                 |                      | 0.002**               |                      | 0.001**               |                      | 0.0099**              |
| <b>TEQ</b>                     |                      |                       |                      |                       |                      |                       |
| Per doubling of exposure       | 1002                 | 5.58 (2.36, 8.90)**   | 998                  | 5.70 (2.40, 9.10)**   | 975                  | 5.20 (1.74, 8.79)**   |
| Quartile 1 ( $\leq 0.08$ pg/g) |                      | Ref                   |                      | Ref                   |                      | Ref                   |
| Quartile 2 (0.09 – 0.11 pg/g)  |                      | 3.97 (-2.48, 10.85)   |                      | 4.68 (-0.78, 10.43)   |                      | 4.30 (-1.07, 9.96)    |
| Quartile 3 (0.12 – 0.18 pg/g)  |                      | 6.97 (-0.34, 14.83)   |                      | 7.94 (1.48, 14.82)*   |                      | 6.91 (0.37, 13.88)*   |
| Quartile 4 ( $> 0.18$ pg/g)    |                      | 9.22 (0.04, 19.25)*   |                      | 9.29 (0.51, 18.83)*   |                      | 6.95 (-1.41, 16.02)   |
| <i>P trend</i>                 |                      | 0.044*                |                      | 0.029*                |                      | 0.073                 |

Abbreviations: PCB: polychlorinated biphenyl; TEQ: toxic equivalent; CI: confidence interval; Ref: reference category

<sup>a</sup>Model 1 is adjusted for age, age<sup>2</sup>, serum lipids

<sup>b</sup>Model 2 is adjusted for age, age<sup>2</sup>, sex, race/ethnicity, BMI, (log)cotinine, white blood cells, percent lymphocytes, percent monocytes, percent neutrophils, percent eosinophils, percent basophils, serum lipids.

<sup>c</sup>Model 3 is additionally adjusted for a second exposure metric. Non-dioxin-like PCBs are adjusted for non-ortho PCBs, serum lipids. Non-ortho PCBs and TEQ are adjusted for non-dioxin-like PCBs. \* $P < 0.05$ ; \*\*  $P < 0.01$

**Table S3.** LTL and risk/odds of dioxin- or PCB-associated cancers.

| Reference                        | Cases | Cancer Type | Study design                | Association between LTL and cancer risk/odds                                                               |
|----------------------------------|-------|-------------|-----------------------------|------------------------------------------------------------------------------------------------------------|
| (Fu et al. 2012)                 | 140   | Liver       | Retrospective, Case-control | Positive (quartile $P_{\text{trend}}=0.079$ )                                                              |
| (Liu et al. 2011)                | 240   | Liver       | Retrospective, Case-control | Positive (quartile $P_{\text{trend}} < 0.001$ )                                                            |
| (Anic et al. 2013)               | 198   | Melanoma    | Retrospective, Case-control | Positive (tertile $P_{\text{trend}} < 0.0001$ )                                                            |
| (Burke et al. 2013)              | 119   | Melanoma    | Retrospective, Case-control | Positive (short LTL OR: 2.81 (95% CI: 1.02–7.72), $P = 0.04$ )                                             |
| (Han et al. 2009)                | 218   | Melanoma    | Prospective, Case-control   | Positive (quartile $P_{\text{trend}} = 0.09$ )                                                             |
| (Nan et al. 2011)                | 557   | Melanoma    | Prospective, Case-control   | Positive (quartile $P_{\text{trend}} = 0.0003$ )                                                           |
| (Sun et al. 2015)                | 191   | Lung        | Retrospective, Case-control | Positive among participants > 60 years (long LTL OR: 0.52 (95% CI: 0.29–0.94), $P = 0.031$ )               |
| (Kim et al. 2015)                | 151   | Lung        | Prospective, Longitudinal   | LTL positively associated with recurrence in women (long LTL hazard ratio: 2.25 (1.02–4.96; $P = 0.044$ )) |
| (Seow et al. 2014)               | 847   | Lung        | Prospective, Case-control   | Positive (quartile $P_{\text{trend}} < 0.0001$ )                                                           |
| (Sanchez-Espiridion et al. 2014) | 1385  | Lung        | Retrospective, Case-control | Positive for adenocarcinoma (quartile $P_{\text{trend}} < 0.001$ )                                         |
| (Lan et al. 2013)                | 215   | Lung        | Prospective, Case-control   | Positive (tertile $P_{\text{trend}} = 0.003$ )                                                             |
| (Shen et al. 2011)               | 229   | Lung        | Prospective, Case-control   | Positive (quartile $P_{\text{trend}} = 0.05$ )                                                             |
| (Hosgood et al. 2009)            | 120   | Lung        | Retrospective, Case-control | No association (Shortest vs longest quartile OR: 1.58 (95% CI: 0.79–3.18))                                 |

|                        |     |                     |                                |                                                                                                                             |
|------------------------|-----|---------------------|--------------------------------|-----------------------------------------------------------------------------------------------------------------------------|
| (Jang et al. 2008)     | 243 | Lung                | Retrospective,<br>Case-control | Inverse (quartile $P_{\text{trend}} < 0.0001$ )                                                                             |
| (Wu et al. 2003)       | 54  | Lung                | Retrospective,<br>Case-control | Inverse (quartile $P_{\text{trend}} = 0.002$ )                                                                              |
| (Hosnijeh et al. 2014) | 235 | NHL                 | Prospective,<br>Case-control   | Positive for follicular lymphoma and diffuse large B-cell lymphoma (quartile $P_{\text{trends}} = 0.02, 0.03$ respectively) |
| (Lan et al. 2009)      | 107 | NHL                 | Prospective,<br>Case-control   | Positive (quartile $P_{\text{trend}} = 0.003$ )                                                                             |
| (Widmann et al. 2007)  | 40  | NHL                 | Retrospective,<br>Case-control | Inverse (shortest vs longest quartile OR: 19.0 (95% CI: 2.1-170.4))                                                         |
| (Lee et al. 2003)      | 15  | NHL                 | Retrospective,<br>Case-control | Inverse (Wilcoxon test $P < 0.001$ )                                                                                        |
| (Xie et al. 2013)      | 137 | Soft tissue sarcoma | Retrospective,<br>Case-control | Positive (quartile $P_{\text{trend}} < 0.001$ )                                                                             |

*Abbreviations:* PCB: polychlorinated biphenyl; Prospective study (LTL measured before outcome had developed); Retrospective study (LTL measured after outcome had developed); NHL: Non-Hodgkin's lymphoma; LTL: Leukocyte telomere length; OR: Odds ratio

## References

- Anic GM, Sondak VK, Messina JL, Fenske NA, Zager JS, Cherpelis BS, et al. 2013. Telomere length and risk of melanoma, squamous cell carcinoma, and basal cell carcinoma. *Cancer Epidem* 37:434-439.
- Burke LS, Hyland PL, Pfeiffer RM, Prescott J, Wheeler W, Mirabello L, et al. 2013. Telomere length and the risk of cutaneous malignant melanoma in melanoma-prone families with and without CDKN2A mutations. *PLOS ONE* 8:e71121.
- Fu X, Wan S, Hann HW, Myers RE, Hann RS, Au J, et al. 2012. Relative telomere length: A novel non-invasive biomarker for the risk of non-cirrhotic hepatocellular carcinoma in patients with chronic Hepatitis B infection. *Eur J Cancer* 48:1014-1022.
- Han J, Qureshi AA, Prescott J, Guo Q, Ye L, Hunter DJ, et al. 2009. A prospective study of telomere length and the risk of skin cancer. *J Invest Dermatol* 129:415-421.
- Hosgood HD 3rd, Cawthon R, He X, Chanock S, Lan Q. 2009. Genetic variation in telomere maintenance genes, telomere length, and lung cancer susceptibility. *Lung Cancer* 66:157-161.
- Hosnijeh FS, Matullo G, Russo A, Guarrera S, Modica F, Nieters A, et al. 2014. Prediagnostic telomere length and risk of B-cell lymphoma-results from the EPIC cohort study. *Int J Cancer* 135:2910-2917.
- Jang JS, Choi YY, Lee WK, Choi JE, Cha SI, Kim YJ, et al. 2008. Telomere length and the risk of lung cancer. *Cancer Sci* 99:1385-1389.

- Kim ES, Ye Y, Vaporciyan AA, Xing J, Huang M, Gu J, et al. 2015. Telomere length and recurrence risk after curative resection in patients with early-stage non-small-cell lung cancer: A prospective cohort study. *J Thorac Oncol* 10:302-308.
- Lan Q, Cawthon R, Shen M, Weinstein SJ, Virtamo J, Lim U, et al. 2009. A prospective study of telomere length measured by monochrome multiplex quantitative PCR and risk of non-Hodgkin lymphoma. *Clin Cancer Res* 15:7429-7433.
- Lan Q, Cawthon R, Gao Y, Hu W, Hosgood HD 3rd, Barone-Adesi F, et al. 2013. Longer telomere length in peripheral white blood cells is associated with risk of lung cancer and the rs2736100 (CLPTM1L-TERT) polymorphism in a prospective cohort study among women in China. *PLOS ONE* 8:e59230.
- Lee JJ, Nam CE, Cho SH, Park KS, Chung IJ, Kim HJ. 2003. Telomere length shortening in non-Hodgkin's lymphoma patients undergoing chemotherapy. *Ann Hematol* 82:492-495.
- Liu J, Yang Y, Zhang H, Zhao S, Liu H, Ge N, et al. 2011. Longer leukocyte telomere length predicts increased risk of Hepatitis B virus-related hepatocellular carcinoma: A case-control analysis. *Cancer* 117:4247-4256.
- Nan H, Du M, De Vivo I, Manson JE, Liu S, McTiernan A, et al. 2011. Shorter telomeres associate with a reduced risk of melanoma development. *Cancer Res* 71:6758-6763.
- Sanchez-Espiridion B, Chen M, Chang JY, Lu C, Chang DW, Roth JA, et al. 2014. Telomere length in peripheral blood leukocytes and lung cancer risk: A large case-control study in Caucasians. *Cancer Res* 74:2476-2486.



- Seow WJ, Cawthon RM, Purdue MP, Hu W, Gao YT, Huang WY, et al. 2014. Telomere length in white blood cell DNA and lung cancer: A pooled analysis of three prospective cohorts. *Cancer Res* 74:4090-4098.
- Shen M, Cawthon R, Rothman N, Weinstein SJ, Virtamo J, Hosgood HD 3rd, et al. 2011. A prospective study of telomere length measured by monochrome multiplex quantitative PCR and risk of lung cancer. *Lung Cancer* 73:133-137.
- Sun B, Wang Y, Kota K, Shi Y, Motlak S, Makambi K, et al. 2015. Telomere length variation: A potential new telomere biomarker for lung cancer risk. *Lung Cancer* 88:297-303.
- Widmann TA, Herrmann M, Taha N, Konig J, Pfreundschuh M. 2007. Short telomeres in aggressive non-Hodgkin's lymphoma as a risk factor in lymphomagenesis. *Exp Hematol* 35:939-946.
- Wu X, Amos CI, Zhu Y, Zhao H, Grossman BH, Shay JW, et al. 2003. Telomere dysfunction: A potential cancer predisposition factor. *J Natl Cancer I* 95:1211-1218.
- Xie H, Wu X, Wang S, Chang D, Pollock RE, Lev D, et al. 2013. Long telomeres in peripheral blood leukocytes are associated with an increased risk of soft tissue sarcoma. *Cancer* 119:1885-1891.
